# Supplementary material for: Mapping a Large Number of QTL for Durable Resistance to Stripe Rust in Winter Wheat Druchamp Using SSR and SNP Markers
Source: PLoS One. 2015 May 13;10(5):e0126794. doi: 10.1371/journal.pone.0126794 (PMC4430513; doi:10.1371/journal.pone.0126794)
Supplement: S4 Dataset — Alleles of 156 polymorphic SSR markers of the Druchamp × Michigan Amber F8 lines. (XLSX) [file pone.0126794.s004.xlsx]

## Sheet: Sheet1
S4 Dataset. SSR marker alleles of F8 lines of the Druchamp x Michigan Amber cross
Name	F8-1 [1]	F8-2 [2]	F8-3 [3]	F8-4 [4]	F8-5 [5]	F8-6 [6]	F8-7 [7]	F8-8 [8]	F8-9 [9]	F8-11 [10]	F8-12 [11]	F8-13 [12]	F8-14 [13]	F8-15 [14]	F8-16 [15]	F8-17 [16]	F8-18 [17]	F8-19 [18]	F8-20 [19]	F8-21 [20]	F8-22 [21]	F8-23 [22]	F8-24 [23]	F8-25 [24]	F8-26 [25]	F8-27 [26]	F8-28 [27]	F8-29 [28]	F8-30 [29]	F8-31 [30]	F8-32 [31]	F8-33 [32]	F8-34 [33]	F8-35 [34]	F8-36 [35]	F8-37 [36]	F8-38 [37]	F8-39 [38]	F8-40 [39]	F8-42 [40]	F8-44 [41]	F8-45 [42]	F8-46 [43]	F8-47 [44]	F8-48 [45]	F8-49 [46]	F8-50 [47]	F8-51 [48]	F8-52 [49]
gwm636	A	B	-	B	B	A	A	A	B	A	-	A	A	A	B	B	B	B	B	B	A	A	B	B	A	B	B	B	A	-	B	A	A	A	B	-	-	-	B	B	A	A	B	B	A	-	B	A	B
gwm626	A	B	B	B	A	-	A	A	A	B	B	A	B	A	A	B	B	B	A	A	B	A	B	B	B	A	A	B	B	-	B	B	B	B	B	B	B	A	A	A	A	B	B	A	B	B	A	A	A
wmc407	A	A	A	A	B	A	A	A	B	A	B	A	A	A	-	B	B	B	B	B	A	A	B	B	A	B	B	B	A	-	B	A	A	A	B	B	-	A	B	B	A	B	B	B	A	A	B	A	B
barc170	A	B	B	B	A	A	B	A	A	B	B	A	A	B	A	A	A	B	B	B	B	A	-	A	A	B	A	-	A	-	A	A	A	B	A	A	A	-	A	B	B	B	A	A	B	B	B	A	A
RGA1	B	B	B	A	A	A	A	A	A	A	A	B	B	-	B	B	A	A	A	B	B	A	B	-	A	A	B	B	B	A	B	A	A	A	B	-	A	A	B	B	B	B	B	A	A	A	B	A	B
gwm604	A	A	B	A	A	B	A	A	A	A	A	A	B	A	B	A	A	A	A	B	B	A	A	B	B	A	B	A	B	-	B	A	A	A	B	B	B	A	A	A	B	A	A	B	B	B	A	B	A
gwm499	B	B	B	A	A	A	B	B	B	B	A	A	B	A	A	A	B	A	A	A	A	B	A	A	A	A	A	B	A	A	A	B	B	B	A	A	A	A	A	B	B	B	B	B	A	B	A	B	B
barc80	B	A	A	A	B	A	A	A	B	B	B	A	B	A	A	B	B	B	B	A	A	B	B	B	A	B	A	B	A	A	B	A	A	B	B	A	A	B	B	A	B	B	A	B	A	A	A	A	A
barc131	A	A	B	A	A	B	B	B	A	B	A	A	B	B	B	A	A	A	A	B	A	A	A	B	-	B	B	B	B	-	B	A	A	A	B	A	A	B	B	A	A	B	A	B	B	B	B	A	A
gwm334	A	B	B	A	B	B	B	B	B	A	A	B	A	A	A	B	A	A	A	B	A	A	B	B	B	A	B	B	A	-	A	-	B	B	A	B	B	B	A	B	B	A	A	B	A	A	A	A	B
gwm427	B	B	B	A	A	A	A	A	B	B	B	B	A	B	A	A	A	A	B	B	B	B	A	B	-	B	A	A	A	-	B	-	A	A	A	A	A	B	-	B	B	A	A	A	B	-	B	A	A
gwm570	B	B	A	B	A	A	A	B	A	B	B	B	B	B	A	A	B	B	B	B	B	B	A	A	B	B	B	B	A	-	B	B	A	B	A	A	A	B	B	A	B	A	B	B	A	B	A	A	A
wmc256	A	B	B	B	A	A	A	B	B	B	B	B	B	B	B	A	A	B	B	B	B	B	A	A	B	B	B	B	A	-	B	B	A	B	A	B	B	B	B	B	B	A	B	B	A	B	B	A	B
wmc243	A	B	B	B	B	A	B	A	B	B	A	B	A	A	A	A	A	A	A	A	B	A	B	B	A	A	A	A	A	-	B	A	A	B	B	A	A	A	A	B	B	A	B	B	A	A	B	A	B
wmc786	A	B	B	B	A	A	-	A	A	B	B	B	-	A	B	A	A	A	B	B	B	B	B	A	A	B	B	B	A	-	B	B	B	B	A	B	B	-	B	A	A	A	B	A	A	B	B	B	-
gwm259	B	B	A	A	B	A	A	A	B	A	B	B	A	B	A	B	B	B	A	A	A	B	B	B	A	B	A	B	A	-	A	B	B	B	B	A	A	B	B	A	A	B	A	B	A	A	B	A	A
gwm498	A	A	A	A	A	A	B	B	B	B	A	A	A	A	B	A	A	A	A	A	A	A	A	B	A	B	B	A	A	-	B	A	A	B	A	B	B	A	A	B	B	B	B	A	A	A	B	A	A
wmc31	B	A	A	B	A	B	A	A	A	B	A	A	B	A	A	A	B	A	B	B	A	B	A	A	A	B	A	A	A	-	A	A	B	B	A	B	B	B	B	A	A	A	B	B	B	A	B	B	A
wmc44	B	B	-	A	B	A	A	-	A	A	B	B	A	A	A	B	B	B	A	B	A	B	B	B	A	B	A	B	A	-	A	B	B	B	B	B	B	B	B	A	A	B	A	B	A	-	B	A	A
wmc416	B	B	A	A	A	A	B	A	B	B	B	A	B	B	B	A	B	B	-	A	B	A	B	-	A	A	A	A	B	-	A	B	B	B	A	A	A	A	A	A	B	A	B	A	B	B	B	A	B
wmc694	A	A	B	B	B	B	A	A	A	B	A	B	B	A	B	A	A	A	B	A	A	A	A	B	A	B	A	B	A	-	B	A	A	A	B	B	B	B	A	A	A	A	B	A	B	B	B	B	A
wmc830	B	B	A	A	B	A	A	-	A	A	B	B	A	A	A	B	B	B	A	B	A	B	B	B	A	B	A	B	A	-	A	B	B	B	B	A	A	B	B	A	A	B	A	B	A	A	B	A	A
barc243	A	B	A	B	-	B	B	B	A	A	A	B	B	A	B	B	A	A	A	B	A	B	A	A	A	B	B	A	A	-	A	-	A	A	A	A	A	A	A	A	B	B	B	A	B	B	A	B	A
gdm138	B	B	A	A	B	A	B	A	A	B	A	A	A	B	B	A	A	B	A	A	B	A	A	B	A	B	B	A	B	-	A	B	A	B	A	B	B	A	A	B	A	B	B	A	A	A	A	B	A
barc4	B	A	B	B	A	A	B	B	A	A	A	A	B	A	B	A	A	A	A	A	A	A	B	A	A	A	B	A	A	-	A	A	B	A	B	A	A	B	A	A	B	B	A	B	B	B	A	B	B
gwm335	B	A	B	B	-	A	B	B	A	B	A	A	B	A	A	A	B	A	A	A	A	A	B	A	B	A	A	A	A	-	B	A	B	A	B	B	B	B	B	B	B	B	A	B	B	B	A	B	-
gwm233	B	B	A	B	A	A	B	B	B	B	B	A	A	A	A	A	A	B	B	A	B	A	-	A	A	A	B	B	A	-	B	B	A	A	B	B	B	-	B	A	A	B	B	A	A	-	B	A	B
wmc790	B	A	-	A	B	-	B	B	B	A	A	A	B	B	A	A	B	A	A	B	A	A	A	A	A	A	A	B	B	-	A	B	A	B	A	A	A	A	A	A	B	A	A	A	B	-	B	A	B
wmc809	B	A	B	B	-	B	A	A	B	B	B	A	B	A	B	A	B	B	B	A	A	A	A	B	A	A	-	A	-	-	A	A	A	B	B	-	-	B	A	B	-	B	B	A	B	B	A	A	B
wmc9	B	B	B	A	A	A	B	A	A	A	A	A	B	A	A	A	B	B	A	B	A	A	A	A	A	B	B	A	A	-	B	A	A	A	B	-	-	B	A	B	A	A	B	B	A	-	B	B	B
barc127	B	B	A	B	A	B	B	B	A	B	B	A	B	A	A	A	B	B	A	A	A	A	A	A	B	A	A	B	B	-	A	A	A	A	B	B	B	B	A	B	B	A	B	A	A	B	A	B	B
barc151	A	B	B	B	B	A	A	A	A	B	A	A	A	B	B	A	B	B	A	B	B	B	A	A	A	B	A	B	B	-	B	A	A	A	B	B	B	A	A	A	B	A	B	B	B	B	B	B	A
gwm60	B	B	A	B	A	B	B	B	A	B	B	A	B	A	A	A	B	B	A	A	A	A	A	A	B	A	A	B	B	-	A	A	A	A	B	A	A	B	A	B	B	A	B	A	A	-	A	A	B
barc121	B	B	B	A	A	A	B	B	A	B	A	B	B	B	A	A	B	A	A	A	B	A	A	A	A	B	B	A	A	-	A	B	A	A	B	A	A	B	A	B	A	A	B	B	B	B	B	A	B
wmc500	-	A	B	B	B	B	A	B	-	B	-	B	B	B	B	-	A	A	B	B	A	B	A	A	B	A	A	A	A	A	B	A	A	A	B	A	A	B	A	A	A	A	A	A	B	A	B	A	A
gwm413	B	A	A	B	A	B	A	A	B	B	A	B	B	B	B	B	B	A	B	B	A	A	A	B	A	B	A	A	A	-	B	B	A	A	B	A	A	A	A	A	A	A	A	A	B	B	B	A	A
barc137	A	A	A	B	B	B	A	B	A	B	A	B	B	A	B	B	B	A	B	A	A	A	A	B	A	B	A	A	A	A	B	A	A	A	B	B	B	A	B	A	A	A	A	A	B	B	B	B	A
wmc235	A	A	A	A	B	B	B	-	B	B	B	A	A	B	B	B	A	B	A	B	B	A	B	B	A	A	B	A	B	-	A	A	B	A	A	A	A	A	A	A	A	A	A	B	B	B	A	B	A
wmc773	B	A	A	B	B	B	B	-	B	B	A	B	B	B	A	A	A	A	A	A	B	B	B	A	A	B	B	A	B	-	A	A	B	A	A	A	A	B	B	B	A	B	A	A	B	-	A	B	B
wmc179	B	B	B	B	A	A	A	-	A	B	B	B	B	B	A	A	B	B	B	B	B	B	A	A	B	B	-	B	A	-	B	B	A	B	A	B	B	B	B	A	B	A	B	B	A	B	A	A	A
barc97	B	A	-	B	B	B	B	B	B	B	A	B	B	-	A	B	B	B	A	B	A	B	B	B	B	B	B	A	A	-	A	A	B	B	B	B	B	A	B	A	B	B	A	A	B	B	B	A	A
cfd60	B	A	A	A	B	B	B	-	B	A	B	B	B	B	B	A	A	A	B	A	B	A	B	A	A	B	B	B	B	-	A	A	B	A	A	A	A	B	B	B	A	B	A	A	B	B	A	B	B
cfd7	A	B	-	A	B	B	B	B	A	B	B	A	A	B	B	A	A	B	B	A	A	A	A	A	A	B	A	A	B	-	A	B	A	A	B	A	A	A	A	A	B	A	B	A	B	B	A	B	B
gwm273	A	A	A	B	B	B	-	B	A	B	A	B	B	A	B	B	B	A	B	A	A	A	A	B	A	B	A	A	A	A	B	A	A	A	B	B	B	A	B	A	A	A	A	A	B	B	B	B	A
wmc51	B	A	B	A	A	A	B	A	A	B	A	A	B	A	A	B	A	A	A	A	B	B	A	A	B	A	B	A	B	B	B	A	A	A	B	B	B	B	B	A	B	A	B	B	A	A	B	B	B
cfd65	B	A	A	B	A	B	A	B	B	B	A	A	B	A	A	A	B	A	B	B	A	B	A	A	A	B	A	A	A	A	A	A	B	B	A	B	B	B	A	A	A	B	B	B	B	A	B	B	A
wmc597	A	B	A	A	A	A	B	B	A	B	A	B	B	A	A	A	A	A	-	B	B	B	-	A	A	A	B	B	A	A	B	-	A	B	B	B	B	B	A	B	B	B	B	B	B	B	B	A	A
wmc432	A	A	B	A	B	B	B	B	A	A	A	B	B	A	A	A	A	A	B	A	B	B	B	B	A	A	B	A	A	-	B	A	B	A	A	A	A	A	B	A	B	A	B	A	A	B	A	B	A
barc124	A	B	A	B	B	A	A	A	B	A	B	A	A	A	B	B	B	B	B	B	A	A	B	B	A	B	B	B	A	-	B	A	A	A	B	A	A	A	B	B	A	A	B	B	A	A	B	A	B
barc18	B	B	B	A	A	A	A	-	A	A	A	B	B	A	A	B	A	A	A	B	B	A	B	A	A	A	B	A	A	-	B	B	A	B	A	A	A	B	A	B	A	A	B	B	B	B	A	A	B
barc135	A	A	B	B	B	B	B	B	B	B	B	B	B	A	B	B	A	B	B	A	B	A	B	B	A	A	B	A	A	-	B	A	B	A	B	A	A	A	A	B	A	A	B	A	A	A	A	A	B
barc343	A	B	A	B	A	A	B	B	A	B	B	A	A	B	A	B	A	B	A	A	B	B	-	A	B	B	A	B	A	-	A	A	B	A	B	A	A	B	B	A	B	A	B	A	A	A	A	A	A
barc20	B	A	B	A	-	A	B	B	A	B	B	A	A	A	B	B	A	B	B	A	A	B	A	B	A	A	B	B	A	-	B	A	A	B	A	A	-	B	B	A	-	B	A	A	B	B	B	B	A
barc180	A	B	-	A	B	A	B	B	A	B	A	B	B	B	B	A	B	A	A	A	B	A	B	B	A	A	A	B	B	-	A	B	A	B	B	B	B	B	B	B	A	A	B	A	B	B	B	B	A
barc79	A	B	B	B	A	-	-	A	A	B	B	A	B	A	A	B	B	B	A	A	B	A	B	A	B	A	-	B	B	-	B	B	B	B	B	B	B	A	A	A	A	B	B	A	B	B	A	A	A
barc27	B	B	A	A	A	A	B	-	B	B	B	A	B	B	B	A	B	B	A	A	B	A	B	B	A	A	A	A	A	-	A	B	B	B	-	B	B	A	A	A	B	A	B	A	B	B	B	A	B
gwm356	B	A	A	A	B	A	B	-	A	B	B	A	A	A	A	B	A	A	A	B	B	A	B	B	A	A	A	B	A	-	A	B	B	B	A	-	-	A	B	A	A	A	A	A	A	A	A	A	A
gwm359	B	A	B	A	-	A	B	-	A	B	B	B	B	-	A	A	A	B	B	B	A	A	-	B	A	B	B	A	A	-	B	-	A	B	A	-	-	A	B	A	B	B	A	B	A	B	A	A	B
gwm494	A	B	A	B	B	A	B	B	A	B	B	A	A	B	A	-	B	A	A	A	B	B	A	A	A	B	B	B	A	-	A	A	A	B	A	A	A	A	A	A	-	B	A	A	A	A	A	A	-
gwm337	B	A	B	B	-	B	A	-	A	B	A	A	B	A	A	A	A	A	A	B	B	B	A	B	A	B	A	B	A	-	A	A	B	A	B	A	A	A	A	B	A	B	B	B	B	-	B	B	A
gwm191	A	B	B	A	B	A	A	A	B	B	A	B	B	A	A	B	B	A	A	A	A	A	B	A	A	A	B	B	-	-	A	-	B	A	B	A	A	B	B	B	A	A	B	A	A	A	A	B	A
gwm408	B	A	B	B	A	B	A	A	A	B	A	A	B	A	B	A	A	A	A	B	B	A	A	B	B	A	B	A	B	-	B	A	A	A	B	B	B	A	A	A	B	B	A	B	B	B	B	B	A
gwm397	B	B	B	A	A	-	B	A	A	B	B	B	B	A	A	A	A	B	B	B	B	A	B	A	A	B	A	A	B	-	A	A	B	B	B	-	-	B	A	A	-	B	A	A	B	-	B	A	B
gwm160	B	A	B	B	A	A	B	B	A	B	B	A	A	B	B	A	A	B	A	A	A	B	A	A	A	A	A	A	A	-	A	A	A	B	B	A	A	B	B	A	A	A	B	A	A	A	B	A	A
wmc219	B	A	B	B	A	A	B	B	B	B	B	A	A	B	B	A	A	B	B	A	A	A	A	A	A	A	A	A	A	-	A	A	A	B	B	A	A	B	B	A	A	A	B	A	A	A	B	B	A
gwm251	B	A	B	A	A	B	B	B	A	A	B	B	B	A	A	B	A	B	B	A	A	B	A	B	A	A	B	B	A	-	B	A	B	A	A	A	A	B	B	A	B	B	A	B	B	B	B	A	A
gwm513	B	A	B	A	A	-	A	B	A	B	B	A	B	A	A	B	A	B	B	A	A	B	A	B	A	A	B	B	A	-	B	A	A	B	A	A	A	A	B	A	B	B	A	B	B	B	B	A	A
wmc413	B	A	B	A	-	-	B	B	B	A	B	A	A	A	A	B	A	B	B	B	A	A	A	B	A	A	B	-	A	-	B	A	B	A	B	B	B	A	A	A	A	A	B	A	B	B	B	A	B
barc83	A	A	A	A	B	A	A	A	B	B	A	A	A	A	A	A	A	B	B	B	B	A	B	B	A	B	A	A	A	A	B	B	A	B	A	A	A	B	A	B	B	B	B	A	A	A	A	A	A
cfd30	A	A	B	B	B	B	B	A	A	A	A	A	A	B	B	B	B	B	A	B	B	B	A	B	A	B	A	A	B	B	B	A	A	A	B	A	A	A	A	A	B	A	B	B	B	B	B	B	A
gwm174	A	B	A	B	B	B	B	B	A	A	B	A	A	A	B	A	A	B	B	A	B	A	B	A	A	B	B	A	B	-	A	A	B	A	A	-	-	A	A	A	A	A	B	A	B	B	A	B	A
cfa2040-1	A	A	A	A	B	B	B	B	A	A	A	A	A	B	A	A	B	B	A	A	B	B	A	B	A	A	A	B	A	-	A	A	B	B	B	A	A	B	B	A	B	B	A	B	A	A	B	B	B
cfa2040-2	B	A	A	B	B	A	A	B	B	B	A	B	B	B	A	A	B	B	A	B	A	B	B	B	B	B	B	B	A	-	B	A	B	B	B	A	A	A	B	A	A	B	A	B	B	A	B	A	A
cfa2040-3	B	A	B	B	B	B	A	A	B	B	B	A	B	A	B	A	B	B	B	A	A	A	A	B	A	A	B	A	B	-	A	B	A	B	B	A	A	B	A	B	A	B	B	A	B	B	A	A	B
wmc149-1	B	B	B	A	A	-	B	B	A	A	A	A	B	A	A	A	A	A	A	A	A	A	B	A	A	A	B	A	A	-	B	A	B	B	B	A	A	A	A	A	B	B	A	B	A	A	A	A	B
wmc149-2	B	B	B	A	A	-	A	A	A	A	B	A	A	A	B	A	B	A	A	A	B	A	B	B	A	A	A	A	B	-	B	A	B	A	A	A	A	B	B	A	A	A	A	B	A	A	A	B	A
barc174-1	B	B	A	A	A	A	A	A	A	B	B	A	B	B	A	A	A	B	B	A	A	A	A	A	A	A	B	B	B	A	B	B	A	B	B	A	A	B	B	A	B	A	A	A	A	A	-	A	B
barc174-2	A	B	-	A	-	A	B	B	A	B	B	B	B	A	A	B	B	B	A	B	A	A	A	A	B	B	B	B	A	-	A	B	A	B	B	A	A	B	A	B	A	A	A	B	A	-	B	B	B
gwm164	A	A	B	A	B	A	B	A	B	B	B	A	A	A	B	A	A	A	A	A	A	A	A	B	A	B	B	B	B	B	B	B	A	B	A	B	B	A	A	B	-	B	A	A	A	A	B	A	A
gwm357	A	A	A	A	B	A	A	A	B	B	A	A	A	A	A	A	A	B	B	A	B	A	B	B	A	B	B	A	A	A	B	B	A	B	A	B	B	A	A	B	B	B	B	A	A	A	A	A	A
gwm296-1	B	A	B	B	B	B	B	B	B	B	B	B	A	B	A	B	A	A	B	A	B	B	B	B	B	A	A	B	B	-	A	-	B	B	-	A	A	-	B	A	B	B	B	A	B	B	B	A	B
gwm296-2	A	A	B	A	B	A	A	A	A	A	B	A	B	A	A	B	A	B	B	B	A	A	B	B	A	A	B	B	A	-	B	-	B	A	-	B	B	-	B	A	A	B	A	A	A	A	A	A	B
barc119-1	B	A	B	B	-	B	A	B	A	B	A	A	B	A	A	A	B	A	A	B	B	B	A	A	A	B	A	B	A	-	A	A	B	B	B	A	A	A	A	B	A	A	B	B	A	B	B	B	A
barc119-2	B	A	B	B	B	B	A	B	A	B	A	B	B	B	B	B	B	B	B	B	A	B	A	A	A	B	A	A	A	A	B	A	A	A	B	B	B	B	B	B	A	A	A	A	B	B	B	A	A
barc119-3	A	A	B	A	B	B	B	A	A	B	B	B	B	B	A	A	A	B	B	A	B	B	B	B	A	B	B	B	B	B	B	B	A	A	B	A	A	B	A	B	A	B	A	A	A	B	B	B	A
gwm136	B	A	B	B	B	B	A	A	B	B	B	B	B	B	B	A	A	B	B	A	B	B	B	B	A	B	A	B	B	B	A	B	B	A	B	B	B	B	B	B	B	B	A	A	B	B	B	B	B
cfd71-1	A	A	B	A	A	B	B	-	A	B	B	A	B	A	A	B	A	B	A	B	A	B	B	A	A	A	A	A	B	-	B	A	B	B	B	B	B	B	B	A	B	B	A	A	B	B	A	A	A
cfd71-2	B	B	A	A	A	A	B	B	B	B	A	B	B	A	A	A	B	A	A	A	B	B	B	A	A	A	B	A	A	-	A	B	B	B	A	B	B	B	A	A	A	B	B	A	B	B	B	A	B
wmc89-1	B	A	B	A	-	A	-	B	A	B	B	A	A	A	B	B	A	B	B	A	A	B	A	B	A	A	B	B	A	-	B	A	A	B	A	A	A	B	B	A	B	B	A	A	B	B	B	B	A
wmc89-2	A	A	B	A	B	B	-	A	A	B	A	A	B	A	A	B	A	B	A	B	A	B	B	A	A	A	A	A	B	-	A	A	B	B	B	A	A	B	B	A	B	B	A	A	B	B	A	A	A
wmc150-1	A	B	B	A	B	A	B	B	A	B	A	B	B	B	B	A	B	A	A	A	B	A	B	B	A	A	A	B	B	-	A	B	A	B	B	B	B	B	B	B	A	A	B	A	B	B	B	B	A
wmc150-2	A	A	B	B	B	A	B	B	B	A	B	A	B	A	A	B	B	B	A	B	B	A	A	A	A	B	B	B	A	-	B	A	A	B	B	A	A	A	A	B	A	B	B	B	A	-	B	A	B
barc10-1	A	A	A	B	B	A	B	A	A	A	B	A	B	B	B	A	A	A	B	A	B	A	B	A	A	B	B	A	B	-	B	A	B	B	B	B	B	B	A	B	A	A	B	A	A	A	B	B	B
barc10-2	B	B	B	A	A	A	A	B	A	A	A	B	A	A	B	A	B	A	B	A	A	B	A	A	A	B	A	A	A	-	B	B	A	A	A	B	B	B	B	A	B	B	A	A	B	B	B	A	B
barc10-3	A	B	B	B	A	A	B	B	B	B	A	B	A	A	A	B	A	A	B	B	B	A	B	B	A	A	A	A	A	-	B	B	A	B	B	A	A	A	A	B	B	B	B	B	A	A	B	B	B
barc10-4	A	A	B	B	B	B	B	B	A	B	B	A	B	A	B	B	A	B	B	B	A	A	A	B	A	A	A	B	A	-	B	A	B	A	A	A	A	B	B	B	A	A	B	A	A	A	B	A	A
wmc206-1	A	A	B	B	A	B	B	A	B	B	A	B	B	B	B	B	A	A	B	B	B	A	A	A	B	A	A	B	A	-	B	B	B	B	B	B	B	B	B	A	A	B	B	A	A	A	B	A	A
wmc206-2	B	A	B	B	A	B	B	B	B	B	A	B	B	B	B	B	B	A	B	B	B	A	B	A	B	A	B	B	A	-	B	B	B	B	B	B	B	B	B	A	A	B	B	B	B	B	B	B	B
wmc206-3	B	A	B	B	B	A	A	B	A	B	A	B	A	A	B	A	A	B	A	A	A	B	B	B	B	B	A	A	A	-	B	A	B	A	B	A	A	A	A	A	A	B	B	B	A	B	A	B	B
wmc206-4	B	B	B	A	A	A	A	A	B	B	B	B	A	B	A	A	A	B	B	B	B	B	B	B	B	B	A	A	A	-	B	A	B	A	B	B	B	B	B	B	B	B	A	B	B	B	B	A	A
wmc206-5	A	B	A	A	B	B	B	B	A	B	B	B	B	B	B	B	B	A	A	B	B	A	B	B	A	B	A	A	B	-	A	A	A	A	A	A	A	B	A	B	B	A	B	B	B	B	B	B	B
barc146-1	B	B	B	B	A	B	B	A	B	A	B	A	B	B	B	B	B	A	A	A	B	A	A	A	B	A	A	B	B	B	B	A	B	A	A	A	A	A	A	A	A	B	B	A	B	A	A	A	A
barc146-2	A	B	A	B	B	A	A	A	A	B	B	B	B	B	A	A	A	A	B	B	B	A	B	A	A	B	B	B	B	B	B	A	A	B	A	A	A	A	A	A	A	A	B	A	B	B	B	B	B
gwm617-1	B	A	B	A	A	A	B	B	B	B	B	B	A	B	A	A	A	B	B	B	B	B	B	B	A	B	A	A	B	A	B	B	A	A	A	A	A	B	A	B	B	A	A	A	B	A	B	A	A
gwm617-2	A	A	B	A	B	A	A	A	A	B	B	B	B	B	A	A	B	B	B	B	B	B	B	B	A	B	A	A	B	B	A	B	B	B	A	A	A	A	A	B	B	B	B	B	B	B	B	B	B
gwm132-1	A	A	B	A	B	A	B	B	A	A	A	A	B	A	A	A	B	B	A	A	B	A	A	B	A	A	A	A	A	A	A	B	A	B	B	A	A	B	B	B	A	B	B	B	A	B	B	B	A
gwm132-2	B	B	B	B	A	B	B	B	B	A	A	A	B	B	B	B	B	B	A	A	B	B	A	B	B	B	A	B	B	B	B	A	B	B	A	B	B	A	A	B	B	B	B	A	B	A	B	A	A
cfd21-1	B	A	B	B	B	B	B	A	B	B	B	B	B	B	B	A	A	A	B	A	B	B	B	B	A	B	A	B	B	-	A	A	B	A	B	B	B	B	B	B	B	B	A	A	B	B	B	B	A
cfd21-2	B	A	B	B	B	A	B	B	A	A	A	B	B	B	A	A	A	B	B	B	A	B	B	B	A	A	B	A	A	-	A	A	B	A	B	B	B	A	B	A	B	B	B	B	A	A	A	B	B
gwm11	A	A	A	B	B	B	A	B	A	B	A	B	B	A	B	B	B	A	B	A	A	A	A	B	A	B	A	A	A	A	B	A	A	A	B	B	B	A	A	A	A	A	A	A	B	B	B	B	A
gwm497-1	B	A	A	B	A	B	B	A	B	B	B	B	B	B	B	B	B	B	A	B	B	A	A	A	A	B	B	B	A	-	B	B	A	B	A	B	B	A	B	A	B	B	B	A	B	B	B	A	B
gwm497-2	A	B	B	B	B	A	A	A	B	A	B	A	A	A	B	B	B	B	B	B	A	A	B	B	A	B	B	B	A	-	B	A	A	A	B	A	B	A	B	B	A	A	B	B	A	A	B	A	B
barc116-1	B	A	B	B	-	A	B	B	A	B	A	A	B	A	A	A	B	A	A	A	A	A	B	A	A	A	A	A	A	-	A	A	B	A	B	A	A	B	B	B	B	B	A	B	B	B	A	B	A
barc116-2	B	A	B	A	A	A	A	B	A	B	B	A	B	A	A	B	A	B	B	A	A	B	B	B	A	A	B	B	A	-	B	A	B	B	A	A	A	B	B	A	B	B	A	B	B	B	B	A	A
barc8	B	A	B	B	B	B	A	B	B	B	A	B	B	B	B	B	B	A	B	B	A	A	A	B	A	A	A	A	A	A	A	A	A	A	B	A	A	B	A	A	A	A	A	A	B	B	B	A	A
gwm131-1	A	B	A	B	A	A	A	B	B	A	B	B	A	B	A	B	B	B	A	B	B	B	A	A	A	B	A	A	B	-	B	A	A	B	A	A	B	B	A	A	A	B	B	A	B	B	B	B	A
gwm131-2	A	B	A	B	B	B	A	A	A	A	B	B	B	B	B	B	B	B	A	A	A	A	B	A	B	A	A	B	A	B	A	A	B	B	B	B	B	-	A	A	A	B	A	B	A	A	B	A	A
gwm131-3	A	A	A	A	A	A	A	A	-	B	B	A	A	A	B	A	A	A	B	A	A	A	B	B	A	B	B	B	B	-	B	B	A	A	B	A	A	A	A	B	A	A	A	B	A	B	B	B	A
gwm131	A	A	A	B	B	B	B	B	A	B	A	B	B	A	B	B	A	A	B	A	A	A	A	B	-	B	A	A	A	A	B	A	A	A	B	-	A	-	A	A	A	A	B	A	B	B	B	B	A
gwm608-1	B	B	B	B	A	B	-	A	B	B	B	A	B	B	A	B	B	B	A	A	B	A	B	B	B	A	A	B	B	B	B	A	B	A	A	A	A	A	A	A	A	B	B	A	B	B	A	A	A
gwm608-2	A	B	B	A	B	B	B	B	A	A	B	B	B	A	B	A	A	A	-	B	B	B	A	A	A	B	A	B	B	B	B	B	A	B	A	B	B	A	A	A	B	B	B	A	A	A	A	A	B
cfa2129-1	A	B	-	B	A	A	B	B	A	A	A	A	B	B	A	A	B	A	B	B	B	B	-	A	B	B	A	B	B	B	A	B	B	B	A	-	B	-	A	A	A	A	A	B	-	B	B	A	A
cfa2129-2	A	A	B	B	A	B	B	B	A	B	B	A	A	A	B	A	A	B	B	A	A	A	B	A	B	B	A	A	A	A	B	A	A	A	B	B	A	B	A	A	A	A	B	A	B	B	B	B	A
cfa2129-3	A	A	A	A	B	A	B	A	B	B	A	B	A	B	A	A	A	B	A	B	B	B	A	A	A	A	B	A	A	A	A	B	A	B	B	A	A	B	A	B	B	A	B	A	B	B	A	B	B
cfd59-1	A	A	B	A	B	A	A	B	B	B	B	A	A	A	A	A	A	B	A	A	A	A	B	B	A	B	B	B	B	B	B	B	A	B	A	A	A	A	A	A	A	B	A	A	A	A	B	A	A
cfd59-2	B	A	A	B	A	B	A	B	B	B	A	A	B	A	A	A	B	A	B	B	A	B	A	A	A	B	A	A	A	A	A	A	B	B	A	A	A	B	A	A	A	A	B	B	B	B	B	B	A
cfd2-1	A	A	B	B	B	A	-	B	A	A	B	B	A	A	-	A	-	A	-	A	B	-	B	B	A	B	A	A	B	B	-	A	-	B	-	-	-	B	B	B	-	-	-	-	B	B	A	A	-
cfd2-2	B	B	B	A	A	A	B	B	B	B	B	B	A	B	-	A	-	B	B	B	B	-	B	B	B	B	A	A	A	A	B	B	B	A	B	B	B	B	B	B	-	-	-	B	B	B	B	A	-
cfd2-3	B	A	B	A	B	A	A	A	B	B	B	B	B	B	-	A	-	B	A	B	B	-	B	B	A	B	A	A	B	B	A	B	B	B	A	A	A	A	A	B	-	-	-	B	B	B	B	B	-
cfd2-4	B	B	B	B	A	B	-	A	A	B	A	B	B	A	-	B	-	A	A	A	B	-	A	B	B	-	-	A	-	-	B	B	A	B	B	B	B	B	B	A	-	-	-	A	A	A	B	B	-
cfd2-5	B	A	A	A	A	A	A	B	B	A	A	A	B	A	-	A	-	A	B	A	A	-	B	A	A	A	A	B	A	A	A	B	B	A	A	A	A	A	A	B	-	-	-	A	A	A	B	B	-
wmc611-1	A	A	-	A	B	A	B	A	B	B	B	A	A	A	B	A	A	A	A	A	A	A	A	B	A	B	B	B	B	B	B	B	A	B	A	A	A	-	A	-	A	B	A	-	A	A	B	A	A
wmc611-2	A	A	-	B	B	B	B	B	A	B	A	-	B	A	B	B	B	A	B	A	A	A	A	B	-	B	A	A	A	A	B	A	A	A	B	B	B	-	A	-	A	A	A	A	B	B	B	B	A
barc144	B	A	A	A	B	A	A	B	A	B	B	B	A	B	A	B	B	B	B	B	A	A	B	B	A	A	A	B	B	B	B	A	B	B	B	B	B	B	B	A	B	B	B	B	A	B	B	B	A
gdm33	A	A	B	A	B	B	B	B	A	B	B	B	B	A	A	A	A	A	B	A	B	B	A	B	A	B	B	A	B	A	B	B	B	B	A	A	A	B	A	A	B	A	B	A	B	B	A	B	B
gwm654	B	A	A	A	B	A	A	B	B	B	B	B	A	B	A	B	B	B	B	B	A	A	A	A	A	A	A	A	B	B	B	A	B	B	B	A	A	B	B	A	B	B	B	B	A	B	B	B	A
gwm565	B	B	A	A	A	A	A	-	B	B	B	B	A	A	B	B	B	B	B	B	A	A	B	A	A	A	A	B	A	-	B	B	B	B	B	A	A	B	B	A	B	B	B	B	A	A	B	B	A
wmc765	B	A	B	A	B	A	A	B	A	B	B	A	A	B	B	B	B	B	B	B	A	B	B	B	A	A	A	B	B	B	A	A	B	B	B	B	B	B	B	A	B	B	B	B	A	A	B	A	A
cfa2141	A	B	A	B	B	B	A	A	A	A	A	B	A	B	B	A	B	A	A	A	A	A	A	A	A	A	A	A	A	A	B	B	A	B	A	B	B	B	A	A	A	A	B	A	A	A	B	A	A
wmc788	A	A	A	B	A	A	B	-	A	B	B	B	-	A	A	B	A	A	B	A	A	A	A	A	A	A	B	A	A	-	A	A	B	A	A	A	A	A	B	B	-	A	B	A	B	A	A	A	A
gwm639	B	A	B	A	A	A	A	A	B	B	A	A	B	A	A	A	A	B	B	A	B	A	B	A	A	A	A	A	A	-	A	A	B	A	B	A	A	A	A	B	B	B	B	A	A	B	B	B	B
barc23	A	A	A	B	B	A	A	A	A	A	A	B	B	A	A	A	B	A	A	B	B	A	B	B	A	A	B	B	B	A	A	-	B	B	A	A	A	B	A	A	A	A	A	A	A	A	B	A	B
wmc500	-	A	B	B	B	B	A	B	-	B	-	B	B	B	B	-	B	A	B	B	A	B	A	A	B	A	A	A	A	A	B	A	A	A	B	B	B	B	A	A	A	A	A	A	B	A	B	A	A
cfd29	A	A	B	A	A	A	A	A	A	A	A	A	A	A	A	B	A	B	B	A	A	B	A	-	A	A	B	A	A	A	A	B	B	A	B	B	B	A	B	-	A	A	A	A	B	A	A	A	A
cfd48	A	B	B	B	A	A	B	B	A	A	A	A	B	A	A	A	B	B	A	B	B	A	A	A	B	B	A	B	A	B	A	B	B	B	A	B	B	B	-	A	A	A	A	B	B	A	B	A	A
gwm213	B	B	B	B	A	A	B	B	A	B	A	A	B	A	B	A	B	B	A	A	A	B	A	A	B	A	A	B	A	A	A	B	B	A	B	B	-	B	A	B	B	B	A	B	B	B	A	B	B
gwm269	A	B	A	A	A	A	-	A	A	B	B	A	A	A	B	A	A	B	B	B	-	B	-	A	A	B	A	B	A	A	A	A	A	B	A	B	B	B	A	A	B	B	A	A	B	A	B	A	A
gwm371	B	B	B	B	B	B	B	B	B	B	B	B	B	B	B	A	B	A	B	A	A	B	A	A	A	A	B	B	A	A	A	B	B	B	B	B	A	B	B	B	A	B	A	A	A	A	A	A	A
gwm540	B	A	B	B	B	A	B	B	A	B	B	A	B	A	A	B	A	B	B	A	A	B	A	B	A	A	B	B	A	B	B	A	B	B	A	A	A	B	A	A	B	B	A	A	B	B	B	B	A
wmc73	B	B	B	B	A	A	B	B	A	A	A	A	B	B	B	A	A	B	A	A	A	B	A	B	B	A	B	B	B	A	A	B	B	A	B	A	B	B	A	B	B	B	A	B	B	B	A	B	B
wmc631	A	A	A	B	A	B	A	A	A	A	B	A	B	B	B	A	B	B	B	B	B	A	B	B	A	A	B	A	A	A	B	B	B	B	B	A	A	A	B	A	A	B	B	B	B	A	B	A	B
wmc636	A	A	A	B	A	A	A	A	A	A	A	B	A	A	-	B	A	A	A	A	A	A	A	B	A	A	B	A	B	B	A	B	B	A	A	A	A	A	B	B	B	A	B	A	B	A	A	A	A
wmc753	B	B	B	A	B	B	B	B	B	B	A	A	B	B	B	A	A	B	A	B	A	B	A	B	A	B	A	A	B	B	B	A	B	A	B	A	A	B	A	B	B	A	A	A	A	A	B	A	B
gdm33-1	B	A	B	B	B	B	A	A	B	B	B	B	B	B	B	A	A	B	B	A	B	B	B	B	A	B	A	B	B	B	A	B	B	A	B	B	B	B	B	B	B	B	A	A	B	B	B	B	B
gdm33-2	B	A	B	B	B	B	A	A	B	B	B	B	B	B	B	A	A	B	B	A	B	B	B	B	A	B	A	B	B	B	A	B	B	A	B	B	B	B	B	B	B	B	A	A	B	B	B	B	B
wmc500	-	A	B	A	B	A	B	B	-	A	-	A	B	A	A	-	B	B	A	A	B	A	A	B	B	A	A	A	A	A	A	B	A	B	B	B	B	B	B	A	A	B	B	B	A	B	B	B	A
[truncated: 47 more columns]
